# Supplementary material for: A Sensitive Hydroquinone Amperometric Sensor Based on a Novel Palladium Nanoparticle/Porous Silicon/Polypyrrole-Carbon Black Nanocomposite
Source: MDPI journal article supplement (doi:10.3390/bios13020178), 2023-01-23
Supplement: s1 [file s1]

## Supplementary Material

### Calculation of effective electrode surface area:

We recorded CV responses utilizing the Pd@PSi-PPy-C/GCE and bare GCE for varying scan rates ranging from 10 to 100 mVs<sup>-1</sup> using 5 mM [Fe(CN)<sub>6</sub>]<sup>3-/4-</sup> in 0.1 M KCl. Later, we plotted the CVs and  $I_{pa}$  vs.  $v^{1/2}$  for Pd@PSi-PPy-C/GCE electrode (**Fig S1**) to calculate the effective surface areas using the Randles-Sevcik equation.

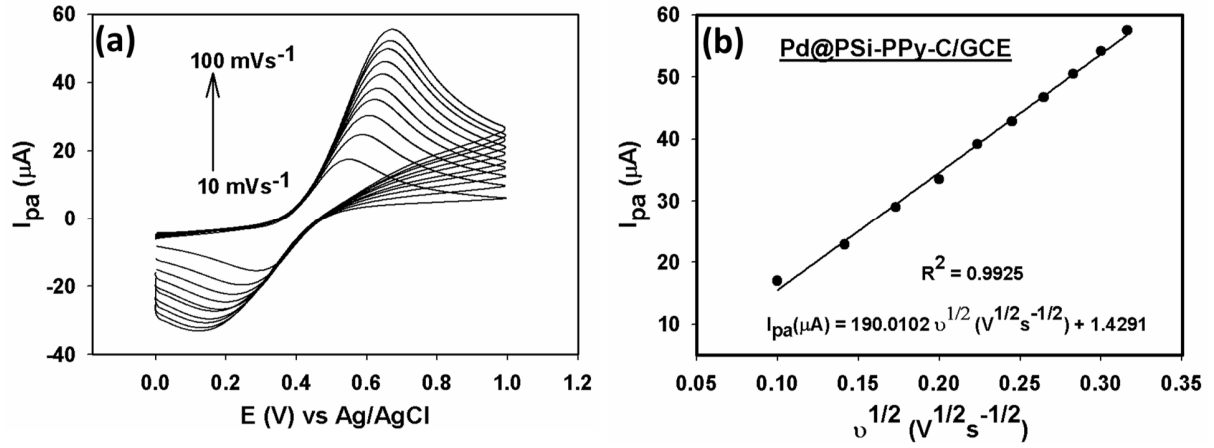

**Fig. S1.** (a) CVs recorded using the Pd@PSi-PPy-C/GCE electrode in 5 mM [Fe(CN)<sub>6</sub>]<sup>3-/4-</sup> in 0.1 M KCl (b) Corresponding  $I_{pa}$  vs.  $v^{1/2}$  plots for the Pd@PSi-PPy-C/GCE electrode

By putting the slope ( $1.9001 \times 10^{-4} \text{ A V}^{-1/2} \text{ s}^{1/2}$ ) of the  $i_p$  vs.  $v^{1/2}$  plot (**Fig. S1a**) in Randles-Sevcik equation,  $i_p = (2.69 \times 10^5) n^{3/2} A_{eff} D^{1/2} C_o v^{1/2}$  we got

$$1.9001 \times 10^{-4} = (2.69 \times 10^5) n^{3/2} A_{eff} D^{1/2} C_o$$

Now, by using the values of  $n=1$ ,  $D = 7.6 \times 10^{-6} \text{ cm}^2 \text{ s}^{-1}$  is the diffusion-coefficient of [Fe(CN)<sub>6</sub>]<sup>3-/4-</sup> [1–3],  $C_o = 5.0 \times 10^{-6} \text{ mol cm}^{-3}$  is the concentration of [Fe(CN)<sub>6</sub>]<sup>3-/4-</sup>, we calculated the effective surface area of the fabricated Pd@PSi-PPy-C/GCE electrode below:

$$A_{eff} = (1.9001 \times 10^{-4}) / [2.69 \times 10^5 \times 1^{3/2} \times (7.6 \times 10^{-6})^{1/2} \times (5.0 \times 10^{-6})] = 0.0512 \text{ cm}^2$$

Similarly, we have calculated the effective surface area of the bare GCE and obtained as 0.0328 cm<sup>2</sup>.

(Those references have been cited in the main text with numbers: 24, 16, and 11 respectively)

## References

1. Ahmed, J.; Faisal, M.; Harraz, F.A.; Jalalah, M.; Alsareii, S.A. Porous Silicon-Mesoporous Carbon Nanocomposite Based Electrochemical Sensor for Sensitive and Selective Detection of Ascorbic Acid in Real Samples. *J. Taiwan Inst. Chem. Eng.* **2021**, *125*, 360–371. <https://doi.org/10.1016/j.jtice.2021.06.018>.
2. Ahmed, J.; Faisal, M.; Jalalah, M.; Alsaiani, M.; Alsareii, S.A.; Harraz, F.A. An Efficient Amperometric Catechol Sensor Based on Novel Polypyrrole-Carbon Black Doped  $\alpha$ -Fe<sub>2</sub>O<sub>3</sub> Nanocomposite. *Colloids Surf. A Physicochem. Eng. Asp.* **2021**, *619*, 126469. <https://doi.org/10.1016/j.colsurfa.2021.126469>.
3. Ahmed, J.; Faisal, M.; Jalalah, M.; Alsareii, S.A.; Harraz, F.A. Novel Polypyrrole-Carbon Black Doped ZnO Nanocomposite for Efficient Amperometric Detection of Hydroquinone. *J. Electroanal. Chem.* **2021**, *898*, 115631. <https://doi.org/10.1016/j.jelechem.2021.115631>.
